# Supplementary material for: New Polyketides from Mangrove Endophytic Fungus Penicillium sp. BJR-P2 and Their Anti-Inflammatory Activity
Source: MDPI journal article supplement (doi:10.3390/md20090583), 2022-09-18
Supplement: s1 [file s1]

## Supporting information

# New Polyketides from Mangrove Endophytic Fungus *Penicillium* sp. BJR-P2 and their Anti-inflammatory Activity

Chen Chen, Geting Ye, Jing Tang, Jialin Li, Wenbin Liu, Li Wu, Yuhua Long\*

GDMPA Key Laboratory for Process Control and Quality Evaluation of Chiral Pharmaceuticals,  
Guangzhou Key Laboratory of Analytical Chemistry for Biomedicine, School of Chemistry, South  
China Normal University, Guangzhou 510006, China

### Content

**Figure S1** HRESIMS of compound 1

**Figure S2**  $^1\text{H}$  NMR spectrum (600 MHz, methanol- $d_4$ ) of compound 1

**Figure S3**  $^{13}\text{C}$  NMR spectrum (600 MHz, methanol- $d_4$ ) of compound 1

**Figure S4** HMQC spectrum (600 MHz, methanol- $d_4$ ) of compound 1

**Figure S5** HMBC spectrum (600 MHz, methanol- $d_4$ ) of compound 1

**Figure S6**  $^1\text{H}$ - $^1\text{H}$  COSY spectrum (600 MHz, methanol- $d_4$ ) of compound 1

**Figure S7** NOESY spectrum (600 MHz, methanol- $d_4$ ) of compound 1

**Figure S8** HRESIMS of compound 2

**Figure S9**  $^1\text{H}$  NMR spectrum (600 MHz, chloroform - $d$ ) of compound 2

**Figure S10**  $^{13}\text{C}$  NMR spectrum (600 MHz, chloroform - $d$ ) of compound 2

**Figure S11** HMQC spectrum (600 MHz, chloroform - $d$ ) of compound 2

**Figure S12** HMBC spectrum (600 MHz, chloroform - $d$ ) of compound 2

**Figure S13**  $^1\text{H}$ - $^1\text{H}$  COSY spectrum (600 MHz, chloroform - $d$ ) of compound 2

**Figure S14** NOESY spectrum (600 MHz, chloroform - $d$ ) of compound 2

**Figure S15** HRESIMS of compound 3

**Figure S16**  $^1\text{H}$  NMR spectrum (600 MHz, chloroform - $d$ ) of compound 3

**Figure S17**  $^{13}\text{C}$  NMR spectrum (600 MHz, chloroform - $d$ ) of compound 3

**Figure S18** HMQC spectrum (600 MHz, chloroform - $d$ ) of compound 3

**Figure S19** HMBC spectrum (600 MHz, chloroform - $d$ ) of compound 3

**Figure S20**  $^1\text{H}$ - $^1\text{H}$  COSY spectrum (600 MHz, chloroform - $d$ ) of compound 3

**Figure S21** NOESY spectrum (600 MHz, chloroform - $d$ ) of compound 3

**Figure S22** HRESIMS of compound 4

**Figure S23**  $^1\text{H}$  NMR spectrum (600 MHz, methanol- $d_4$ ) of compound 4

**Figure S24**  $^{13}\text{C}$  NMR spectrum (600 MHz, methanol- $d_4$ ) of compound 4

**Figure S25** HMQC spectrum (600 MHz, methanol- $d_4$ ) of compound 4

**Figure S26** HMBC spectrum (600 MHz, methanol- $d_4$ ) of compound 4

**Figure S27**  $^1\text{H}$ - $^1\text{H}$  COSY spectrum (600 MHz, methanol- $d_4$ ) of compound 4

**Figure S28** NOESY spectrum (600 MHz, methanol- $d_4$ ) of compound 4

**Figure S29** Experimental (Exp.) and calculated (Cal.)  $^1\text{H}$  and  $^{13}\text{C}$  chemical shift

values of **3** and its possible isomers

**Figure S30** DP4+ analysis of **3**

**Figure S31** Experimental (Exp.) and calculated (Cal.)  $^1\text{H}$  and  $^{13}\text{C}$  chemical shift values of **4** and its possible isomers

**Figure S32** DP4+ analysis of **4**

**Figure S33** Proposed biosynthetic pathways for compounds **1- 4**.

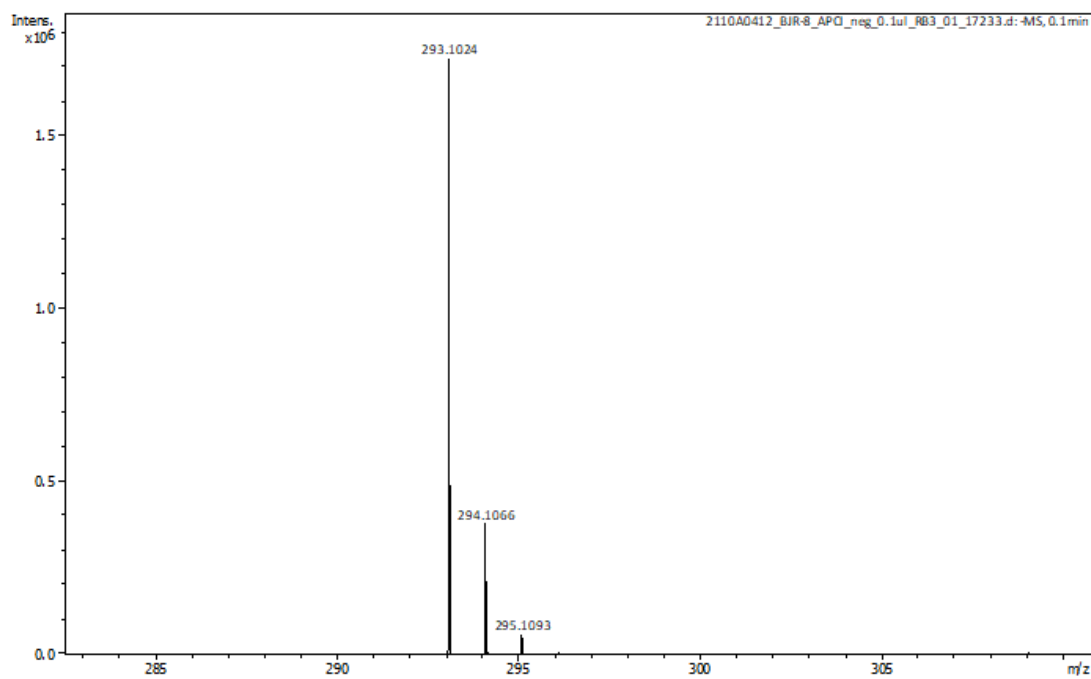

SPECTRUM - simulation :

| m/z      | Theo. Mass | Delta (ppm) | RDB equiv. | Composition                                    |
|----------|------------|-------------|------------|------------------------------------------------|
| 293.1024 | 293.1031   | 2.3         | 7          | C <sub>15</sub> H <sub>17</sub> O <sub>6</sub> |

**Figure S1** HRESIMS of compound **1**

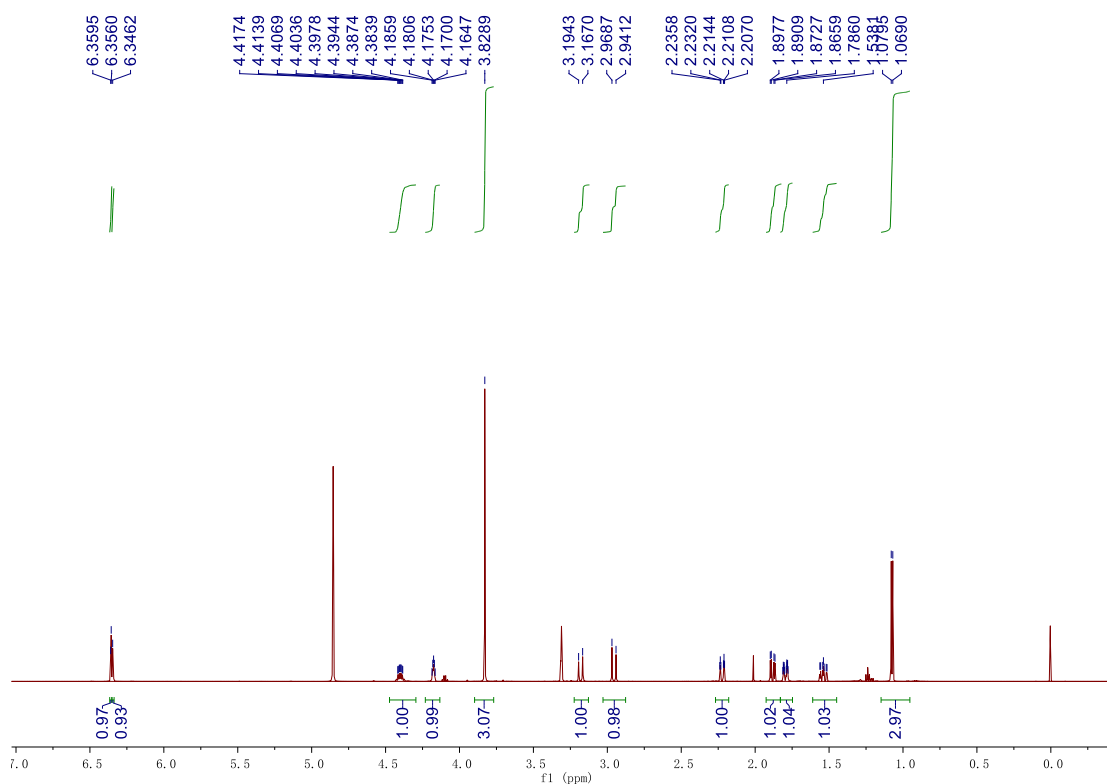

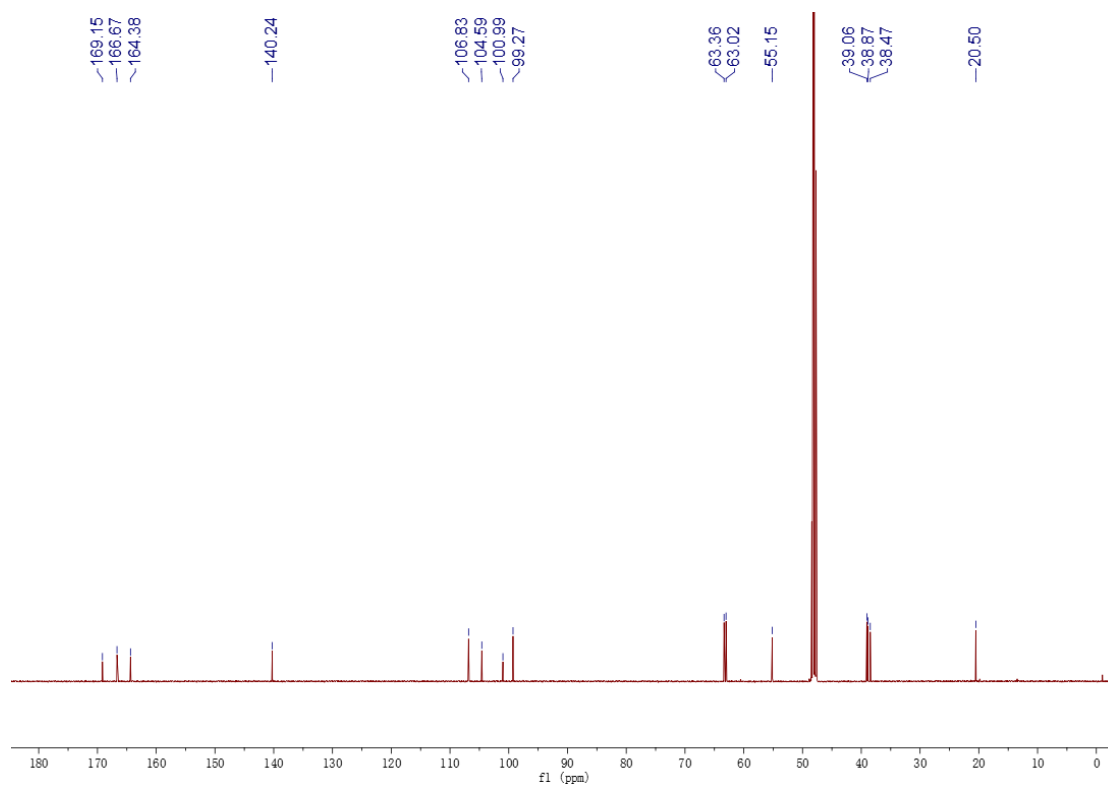

**Figure S3**  $^{13}\text{C}$  NMR spectrum (600 MHz, methanol- $d_4$ ) of compound **1**

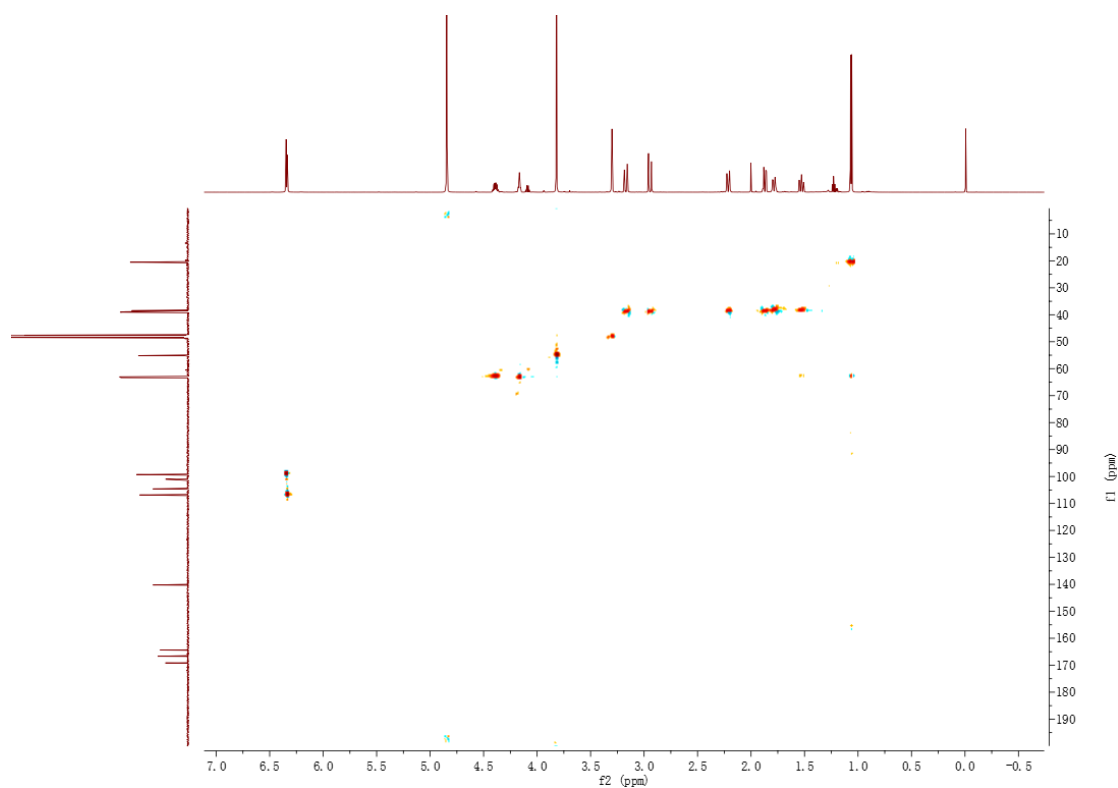

**Figure S4** HMQC spectrum (600 MHz, methanol- $d_4$ ) of compound **1**

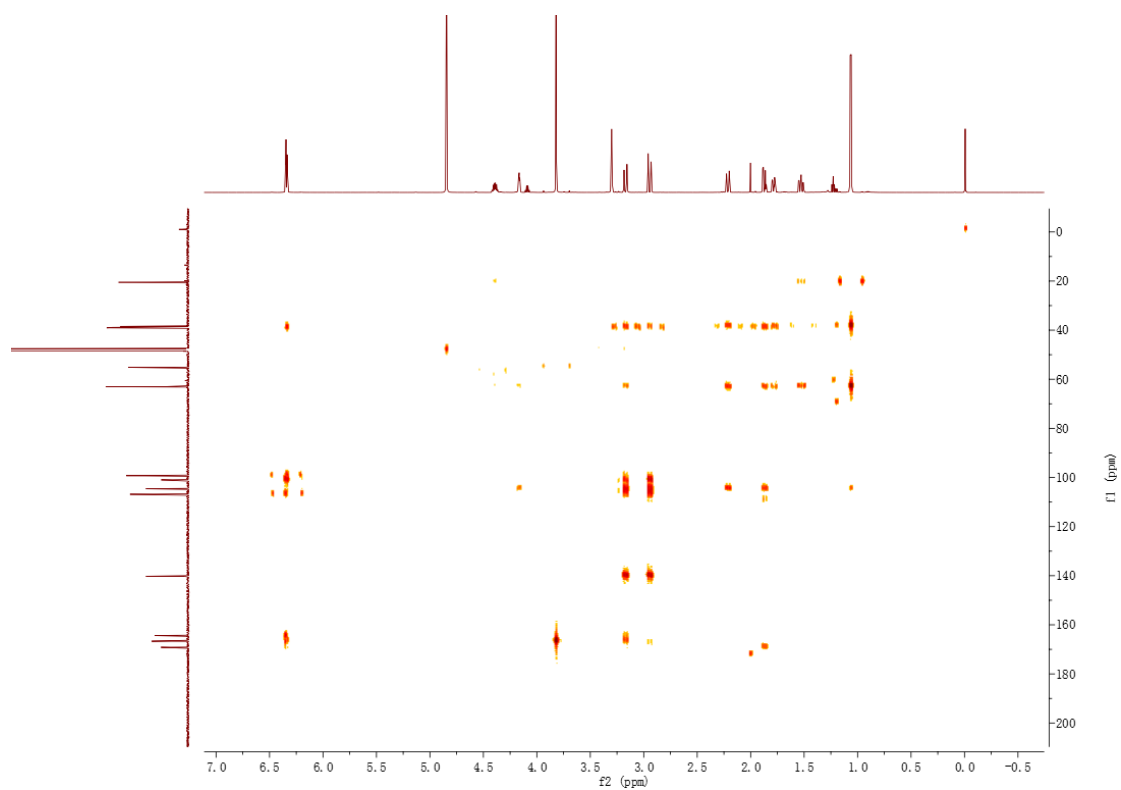

**Figure S5** HMBC spectrum (600 MHz, methanol- $d_4$ ) of compound **1**

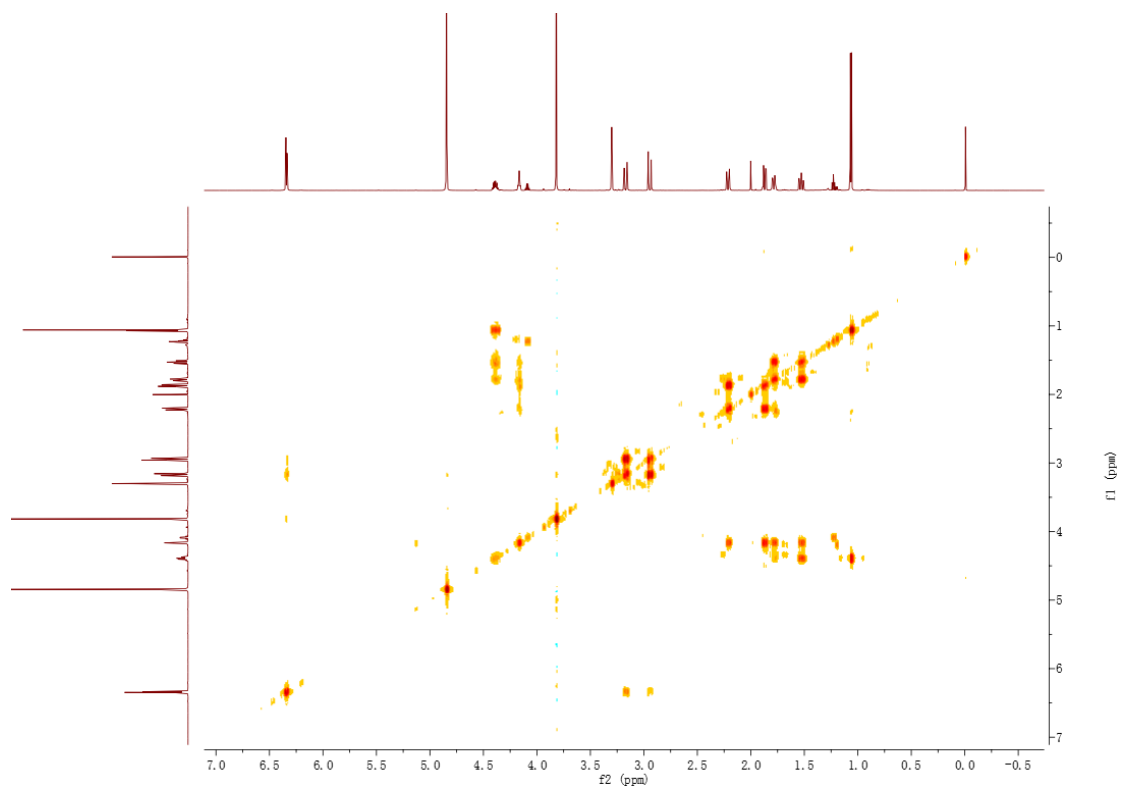

**Figure S6**  $^1\text{H}$ - $^1\text{H}$  COSY spectrum (600 MHz, methanol- $d_4$ ) of compound **1**

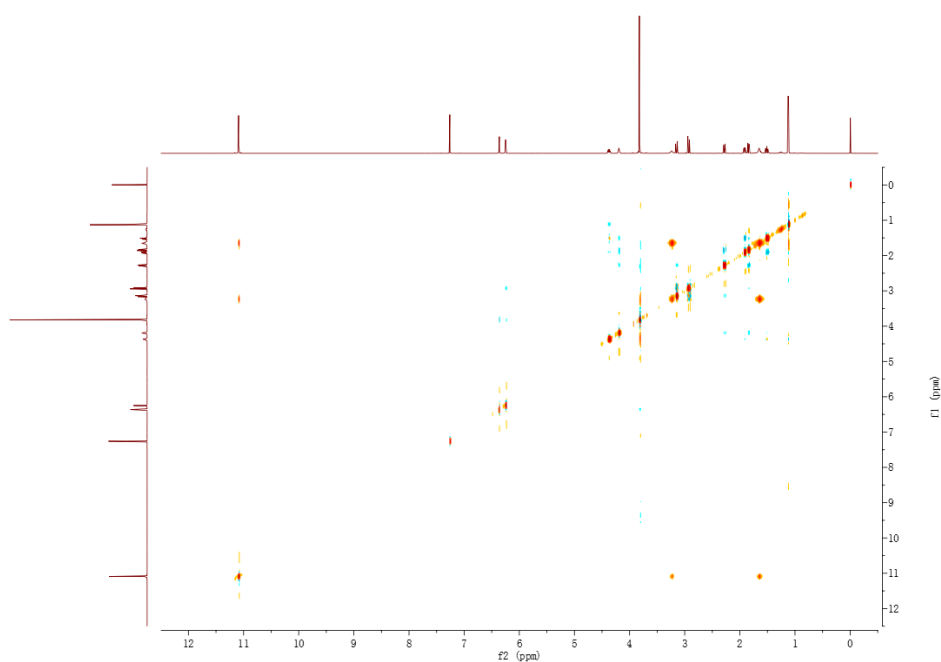

**Figure S7** NOESY spectrum (600 MHz, chloroform -*d*) of compound **1**

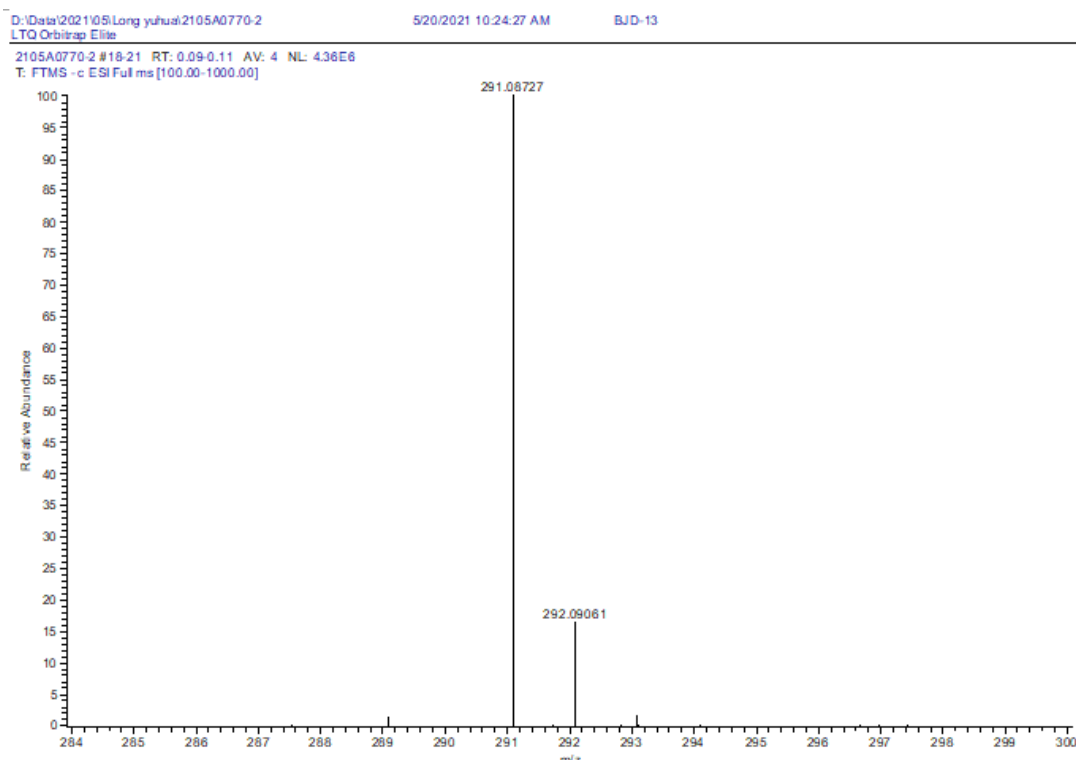

SPECTRUM - simulation :

| m/z       | Theo. Mass | Delta (ppm) | RDB equiv. | Composition                                    |
|-----------|------------|-------------|------------|------------------------------------------------|
| 291.08727 | 291.08741  | -0.14       | 8.5        | C <sub>15</sub> H <sub>15</sub> O <sub>6</sub> |

**Figure S8** HRESIMS of compound **2**

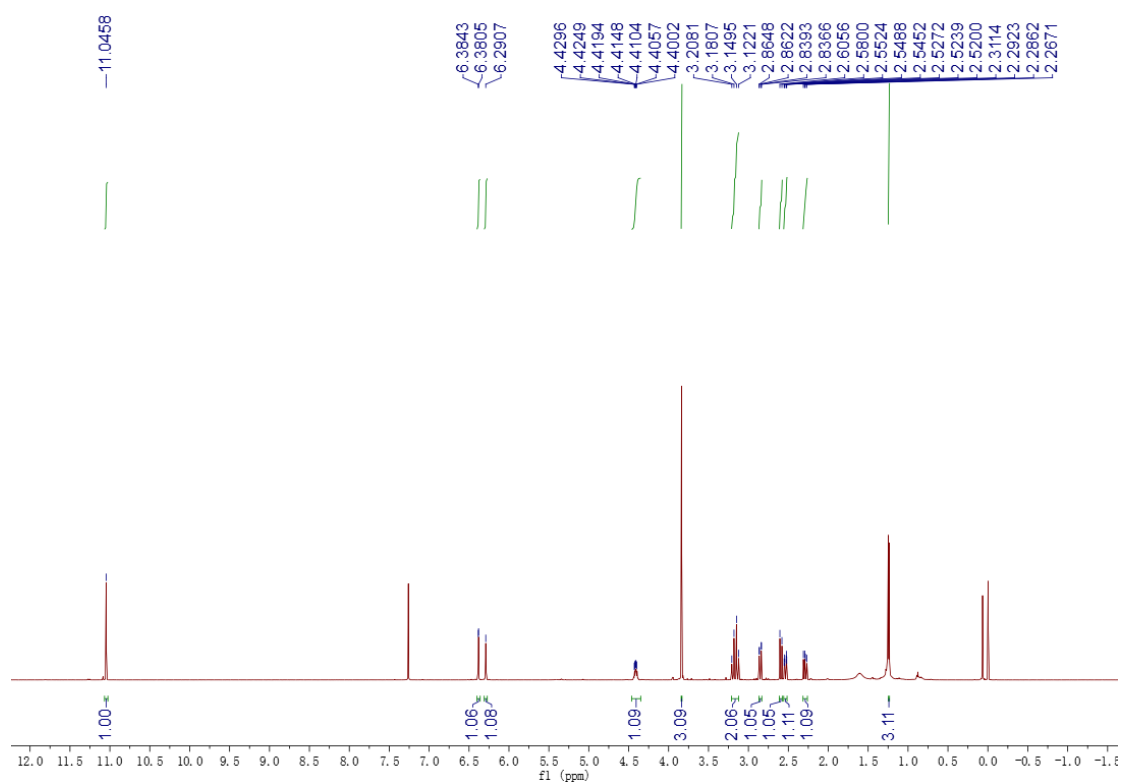

**Figure S9** <sup>1</sup>H NMR spectrum (600 MHz, chloroform-*d*) of compound **2**

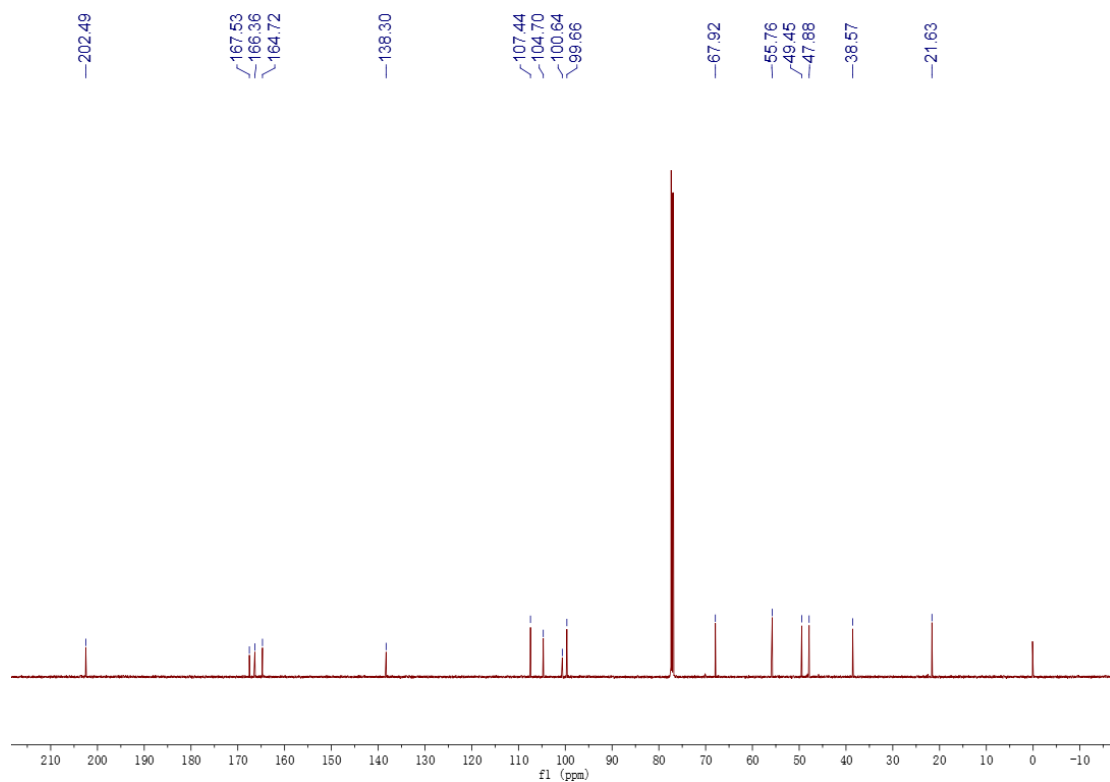

**Figure S10** <sup>13</sup>C NMR spectrum (600 MHz, chloroform-*d*) of compound **2**

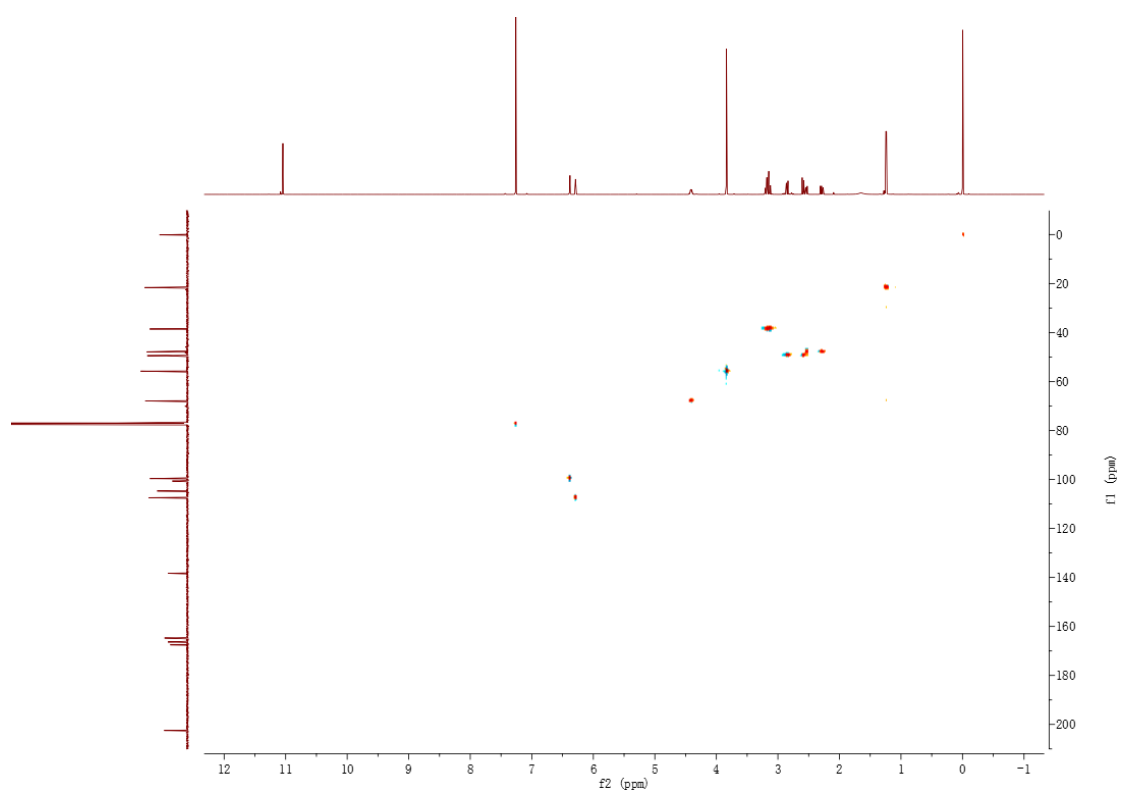

**Figure S11** HMQC spectrum (600 MHz, chloroform -*d*) of compound **2**

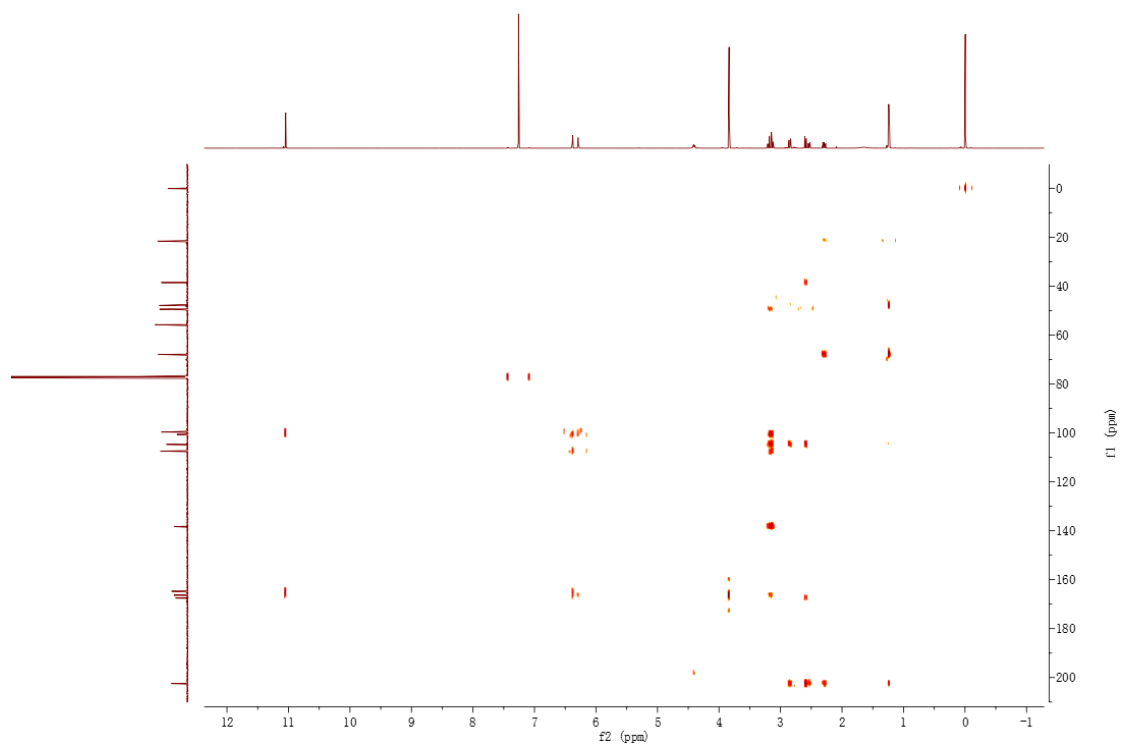

**Figure S12** HMBC spectrum (600 MHz, chloroform -*d*) of compound **2**





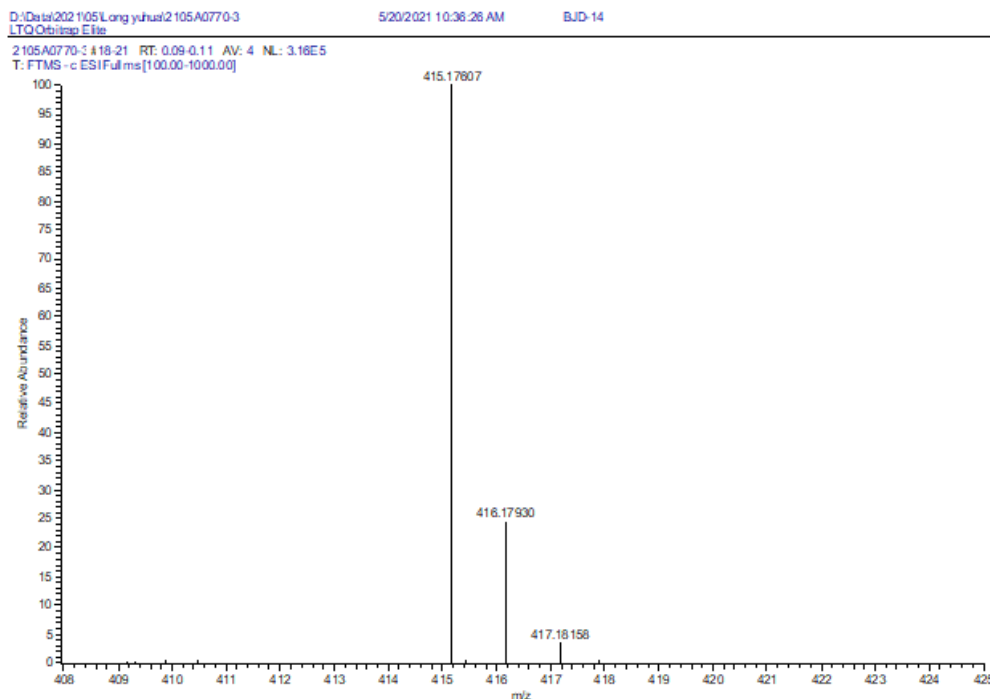

SPECTRUM - simulation :

| m/z       | Theo. Mass | Delta (ppm) | RDB equiv. | Composition                                    |
|-----------|------------|-------------|------------|------------------------------------------------|
| 415.17607 | 415.17623  | -0.38       | 10.5       | C <sub>23</sub> H <sub>27</sub> O <sub>7</sub> |

Figure S15 HRESIMS of compound **3**

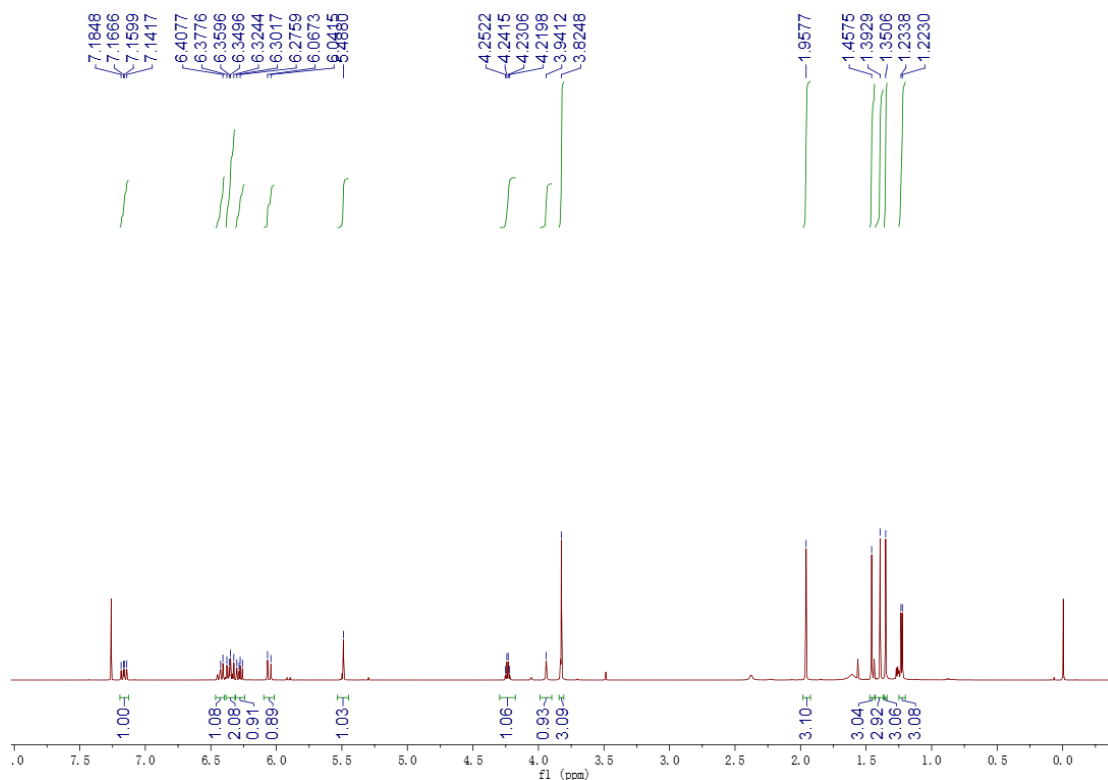

Figure S16 <sup>1</sup>H NMR spectrum (600 MHz, chloroform-*d*) of compound **3**

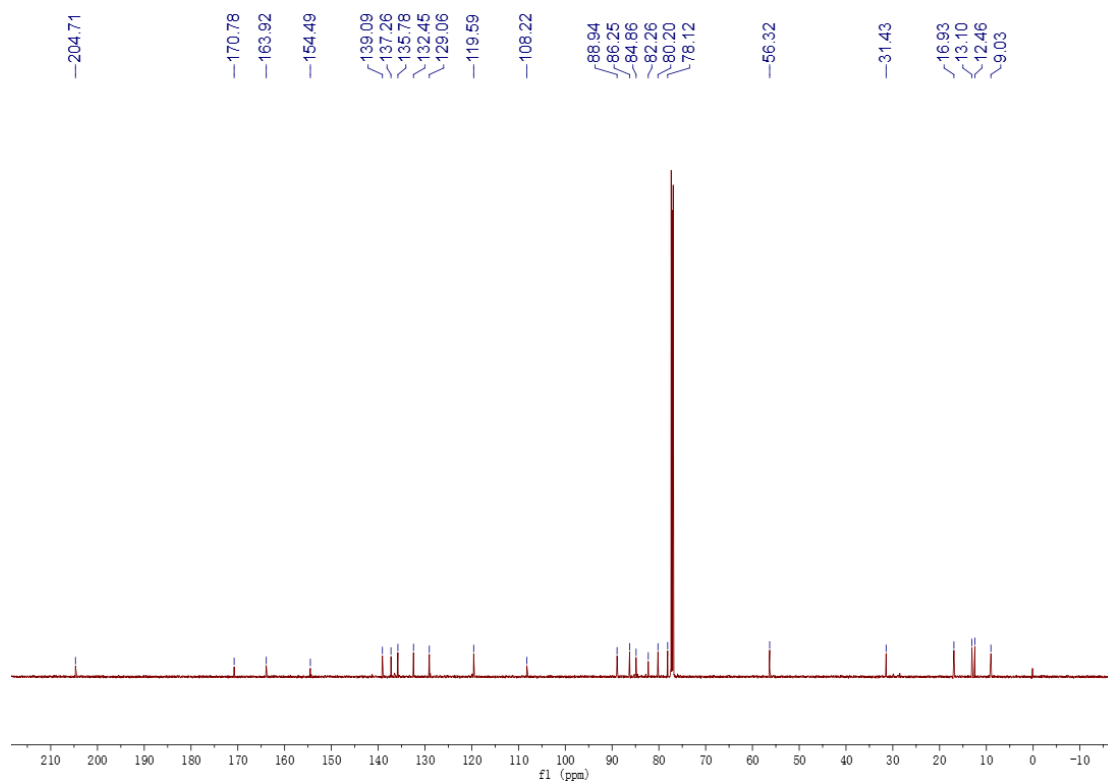

**Figure S17**  $^{13}\text{C}$  NMR spectrum (600 MHz, chloroform *-d*) of compound **3**

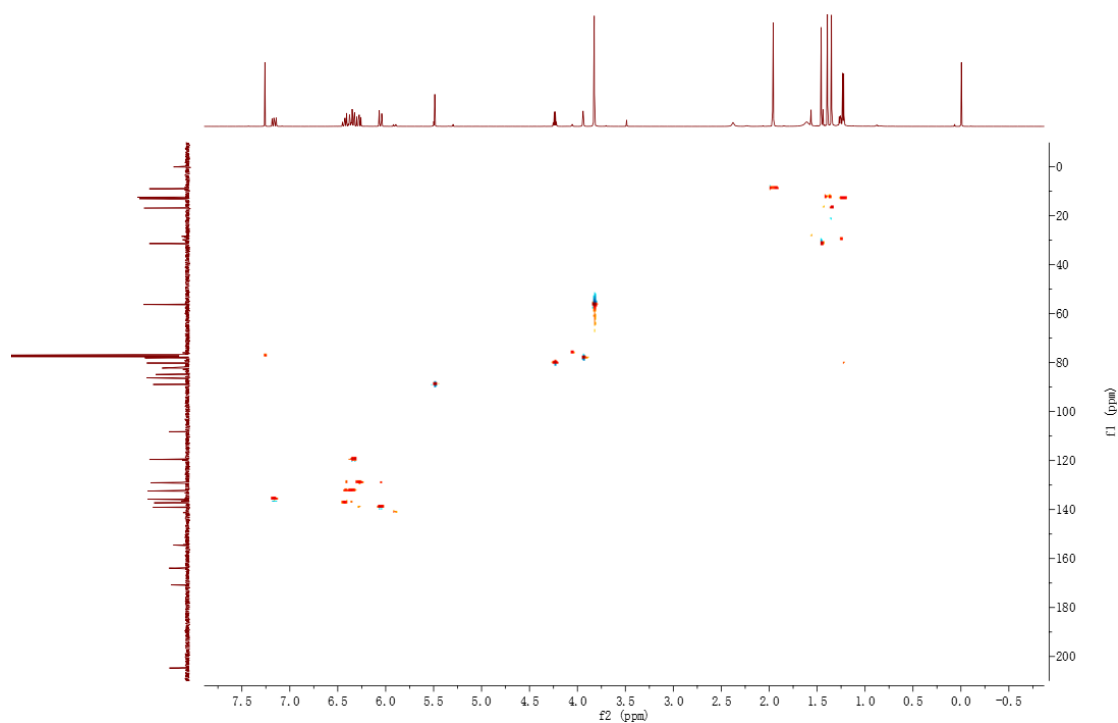

**Figure S18** HMBC spectrum (600 MHz, chloroform *-d*) of compound **3**

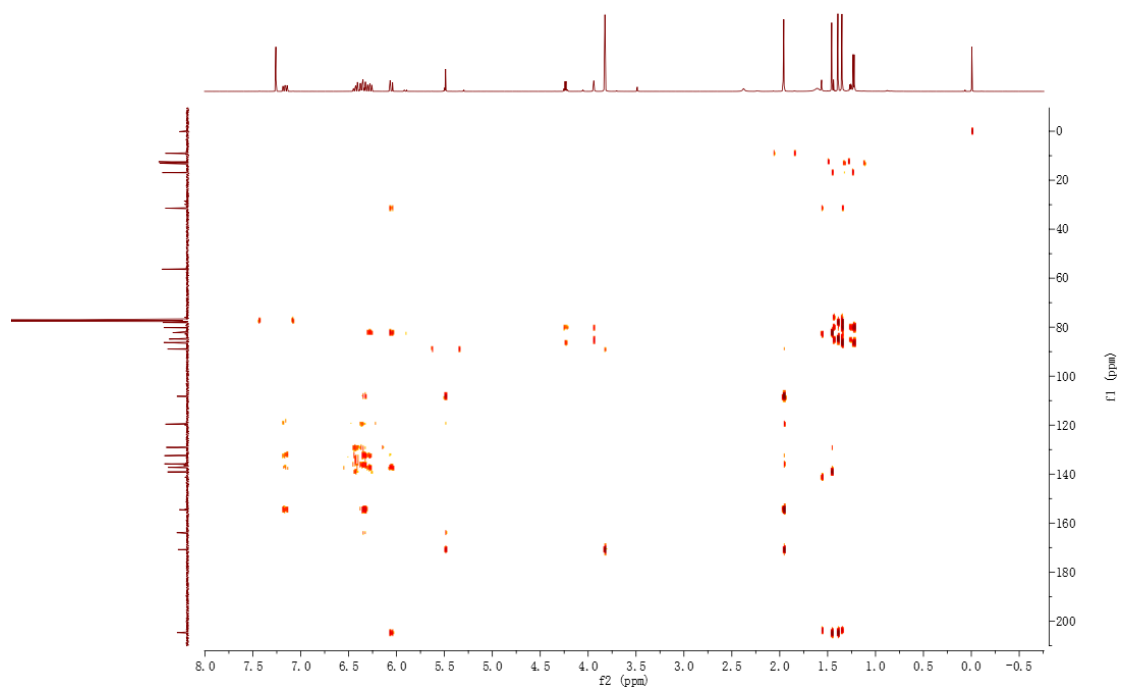

**Figure S19** HMBC spectrum (600 MHz, chloroform -*d*) of compound **3**

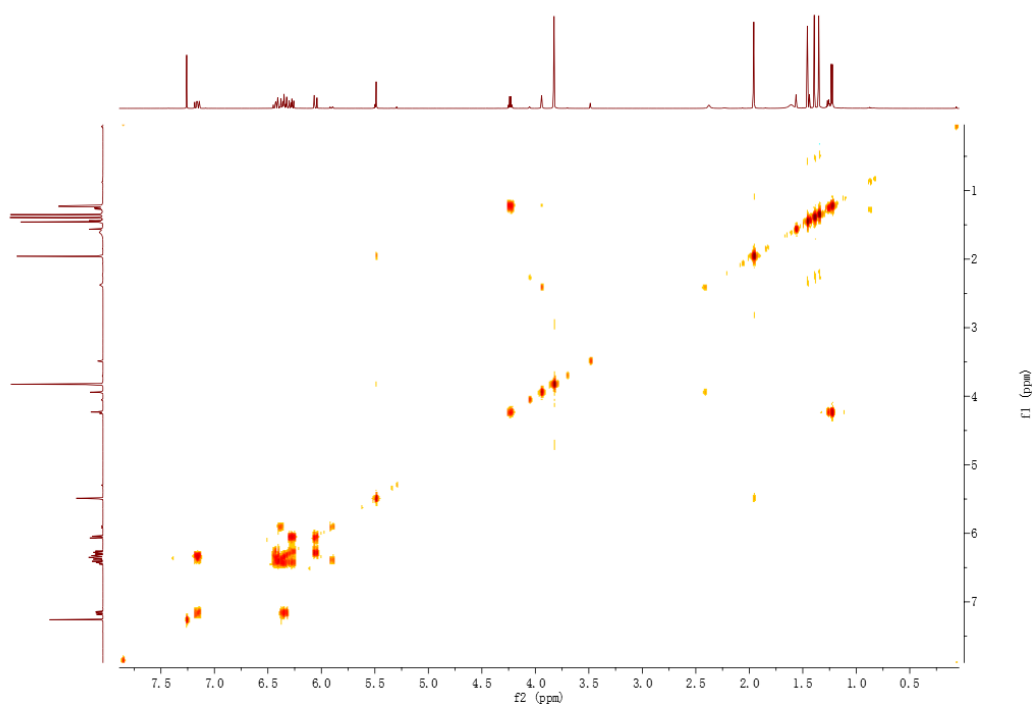

**Figure S20**  $^1\text{H}$ - $^1\text{H}$  COSY spectrum (600 MHz, chloroform -*d*) of compound **3**

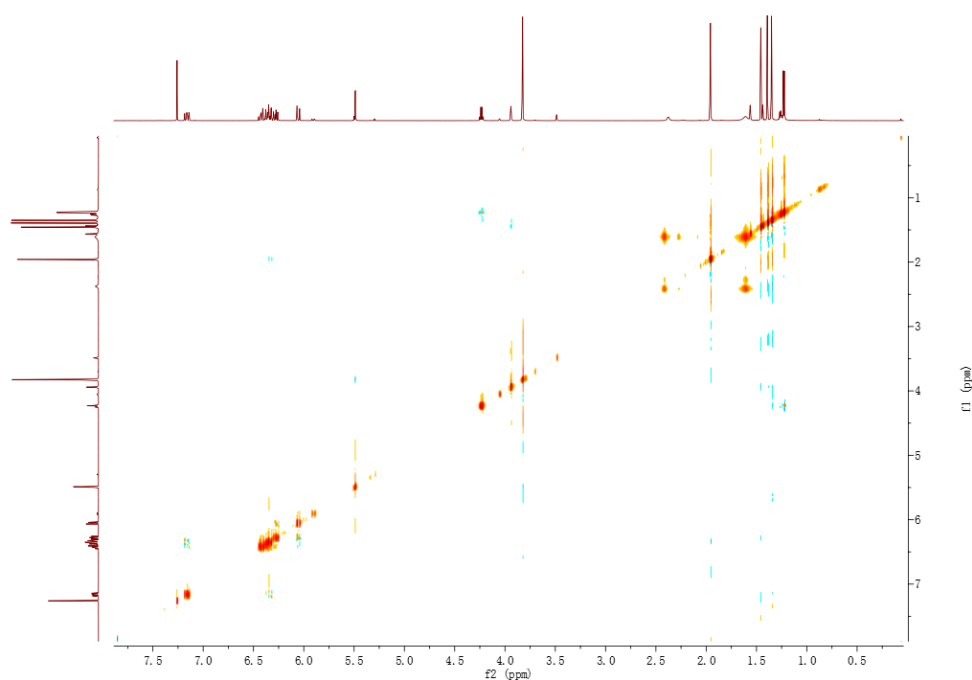

**Figure S21** NOESY spectrum (600 MHz, chloroform -*d*) of compound **3**

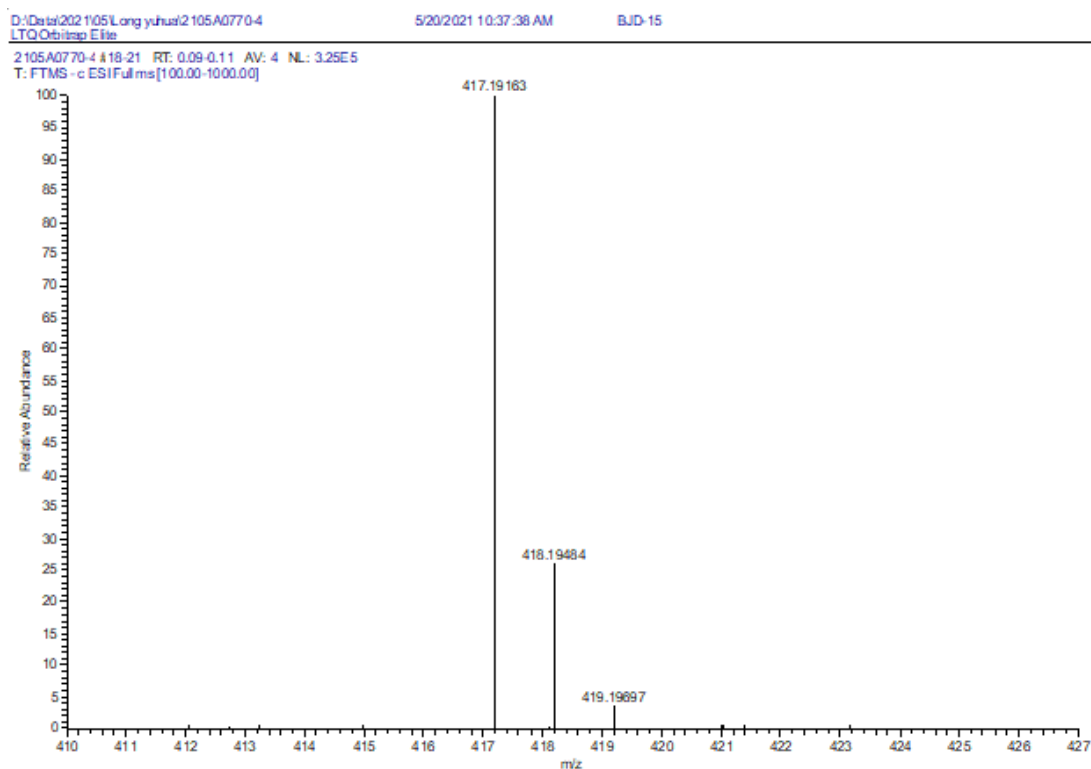

SPECTRUM - simulation :

| m/z       | Theo. Mass | Delta (ppm) | RDB equiv. | Composition                                    |
|-----------|------------|-------------|------------|------------------------------------------------|
| 417.19163 | 417.19188  | -0.59       | 9.5        | C <sub>23</sub> H <sub>29</sub> O <sub>7</sub> |

**Figure S22** HRESIMS of compound **4**

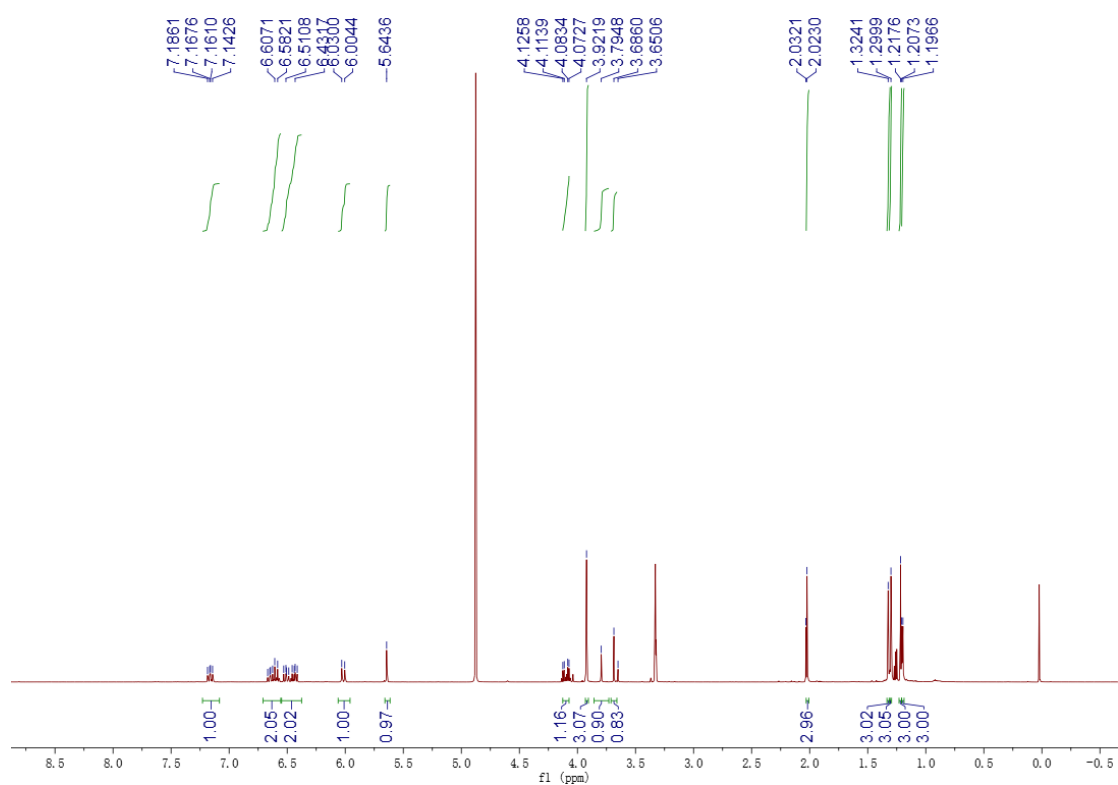

**Figure S23** <sup>1</sup>H NMR spectrum (600 MHz, methanol-*d*<sub>4</sub>) of compound **4**

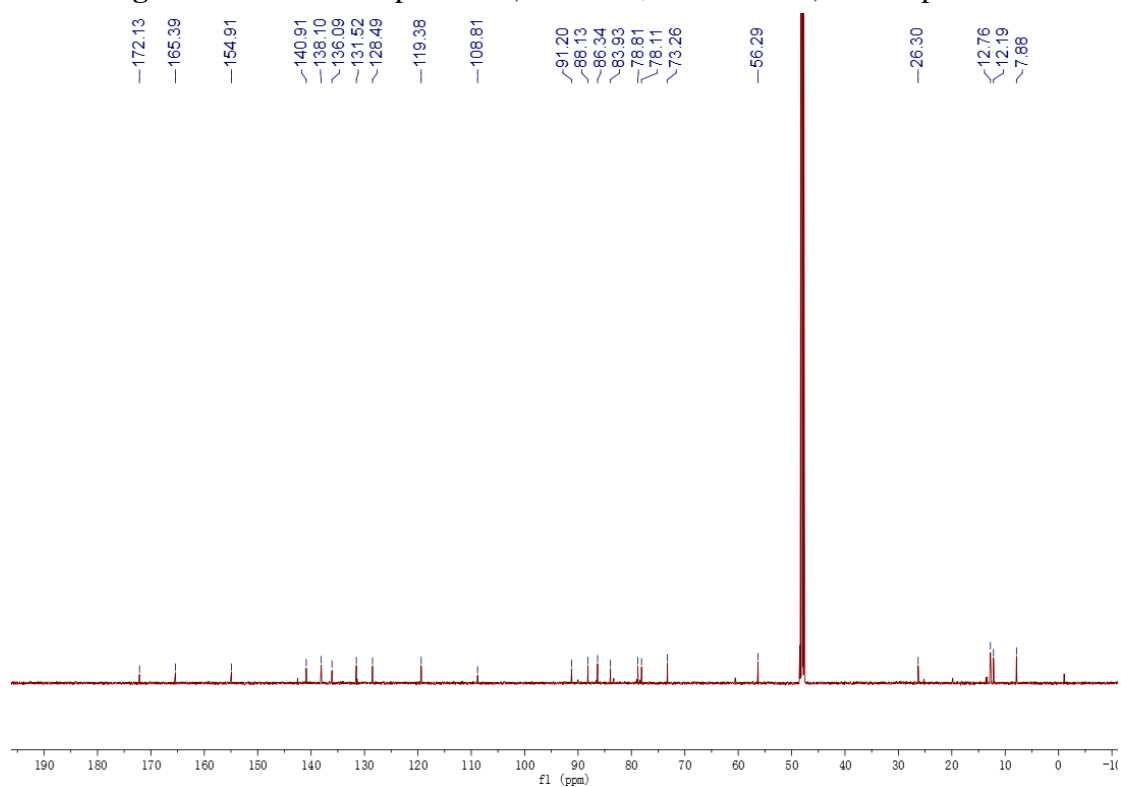

**Figure S24** <sup>13</sup>C NMR spectrum (600 MHz, methanol-*d*<sub>4</sub>) of compound **4**

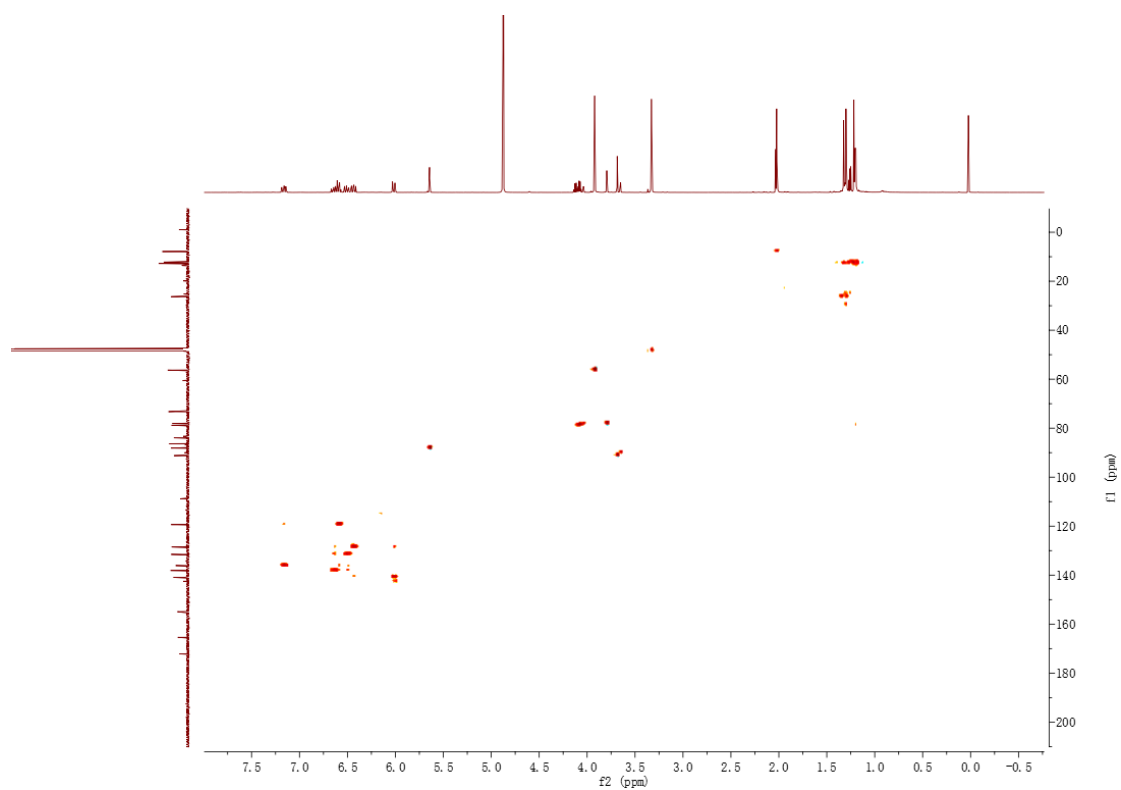

**Figure S25** HMQC spectrum (600 MHz, methanol-*d*<sub>4</sub>) of compound **4**

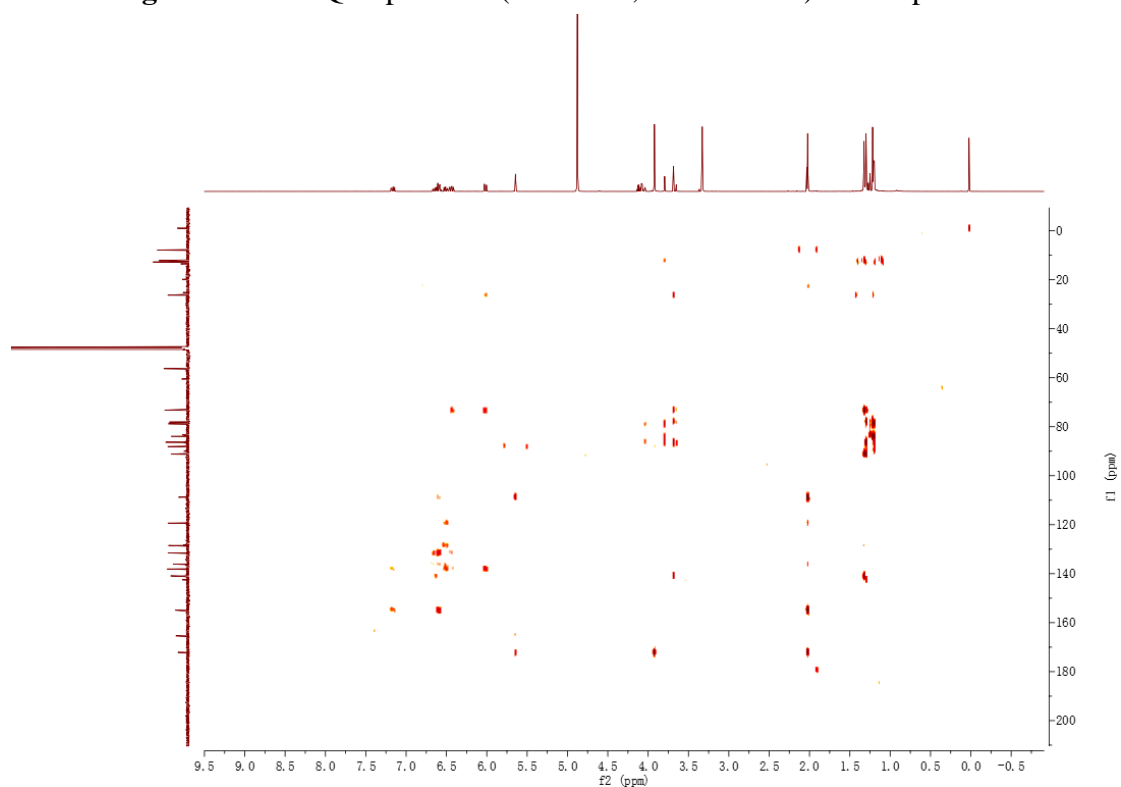

**Figure S26** HMBC spectrum (600 MHz, methanol-*d*<sub>4</sub>) of compound **4**

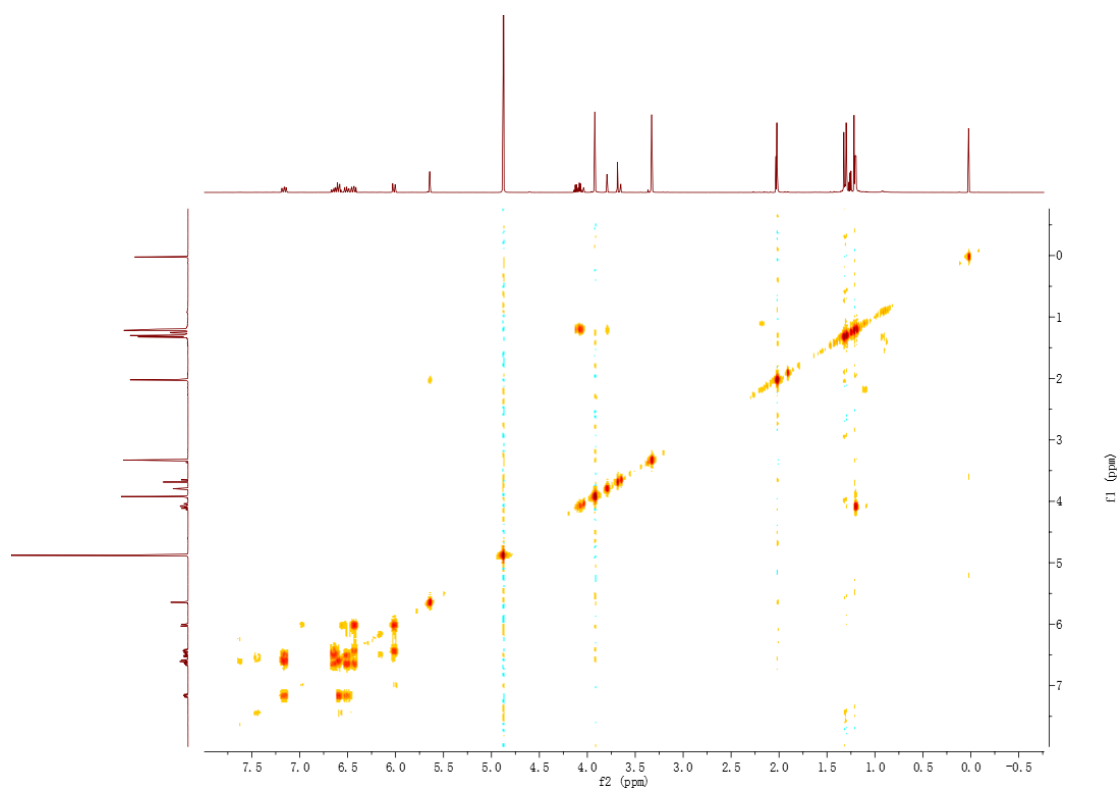

**Figure S27**  $^1\text{H}$ - $^1\text{H}$  COSY spectrum (600 MHz, methanol- $d_4$ ) of compound **4**

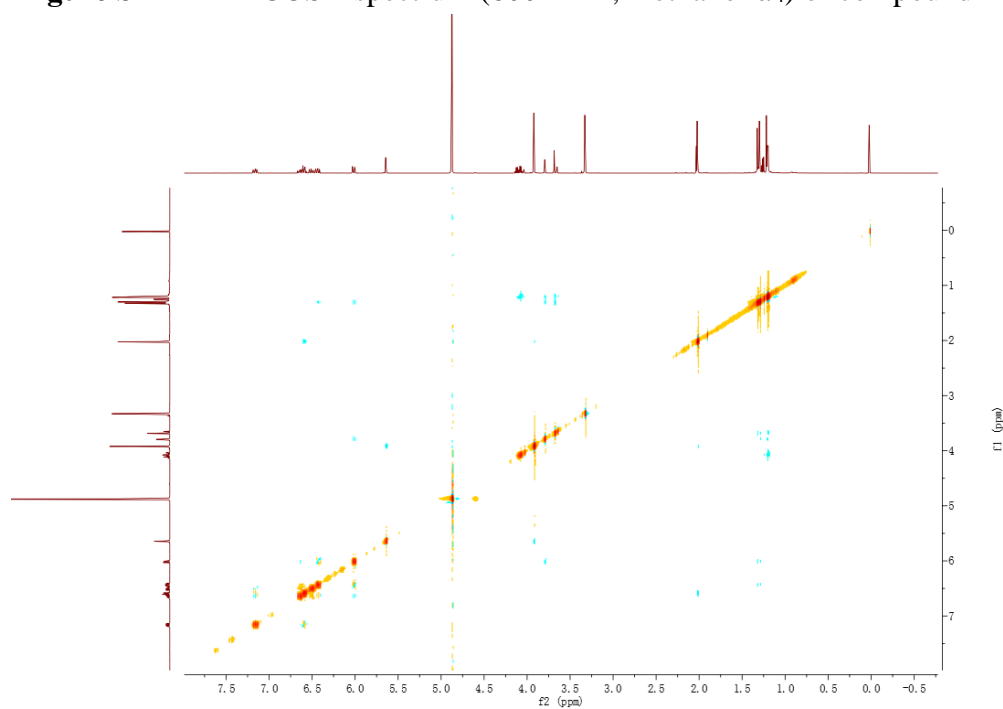

**Figure S28** NOESY spectrum (600 MHz, methanol- $d_4$ ) of compound **4**



| Functional<br>mPW1PW91 |      | Solvent?<br>PCM | Basis Set<br>6-31+G(d,p) |          | Type of Data<br>Unscaled Shifts |          |
|------------------------|------|-----------------|--------------------------|----------|---------------------------------|----------|
|                        |      | DP4+            | #REF!                    | -        | -                               | -        |
| Nuclei                 | sp2? | Experiment      | Isomer 1                 | Isomer 2 | Isomer 3                        | Isomer 4 |
| C                      |      | 80.2            | 79.6                     | 78.0     |                                 |          |
| C                      |      | 86.25           | 79.1                     | 80.3     |                                 |          |
| C                      |      | 78.12           | 87.6                     | 86.6     |                                 |          |
| C                      |      | 84.86           | 86.9                     | 91.7     |                                 |          |
| C                      |      | 204.71          | 223.3                    | 218.2    |                                 |          |
| C                      |      | 82.26           | 85.7                     | 83.9     |                                 |          |
| C                      |      | 139.09          | 143.1                    | 138.1    |                                 |          |
| C                      |      | 129.06          | 130.0                    | 131.8    |                                 |          |
| C                      |      | 137.26          | 140.2                    | 134.0    |                                 |          |
| C                      |      | 132.45          | 132.7                    | 128.8    |                                 |          |
| C                      |      | 135.78          | 137.6                    | 132.1    |                                 |          |
| C                      |      | 119.59          | 119.34                   | 115.48   |                                 |          |
| C                      |      | 154.49          | 156.36                   | 155.76   |                                 |          |
| C                      |      | 108.22          | 110.45                   | 111.01   |                                 |          |
| C                      |      | 170.78          | 170.66                   | 170.66   |                                 |          |
| C                      |      | 88.94           | 88.54                    | 87.70    |                                 |          |
| C                      |      | 163.92          | 162.68                   | 162.51   |                                 |          |
| C                      |      | 12.46           | 23.16                    | 22.67    |                                 |          |
| C                      |      | 13.1            | 12.22                    | 11.70    |                                 |          |
| C                      |      | 31.43           | 27.36                    | 26.86    |                                 |          |
| C                      |      | 9.03            | 10.07                    | 10.26    |                                 |          |
| C                      |      | 56.32           | 55.23                    | 55.42    |                                 |          |
| C                      |      | 16.93           | 18.87                    | 16.82    |                                 |          |
| H                      |      | 4.24            | 3.83                     | 3.78     |                                 |          |
| H                      |      | 3.94            | 3.88                     | 3.93     |                                 |          |
| H                      |      | 6.05            | 6.00                     | 5.69     |                                 |          |
| H                      |      | 6.43            | 6.71                     | 6.80     |                                 |          |
| H                      |      | 6.27            | 6.79                     | 7.17     |                                 |          |
| H                      |      | 6.36            | 6.58                     | 6.27     |                                 |          |
| H                      |      | 7.16            | 7.32                     | 7.01     |                                 |          |
| H                      |      | 6.34            | 6.48                     | 7.07     |                                 |          |
| H                      |      | 5.49            | 5.32                     | 5.29     |                                 |          |
| H                      |      | 1.39            | 1.33                     | 1.37     |                                 |          |
| H                      |      | 1.23            | 1.24                     | 1.24     |                                 |          |
| H                      |      | 1.46            | 1.42                     | 1.41     |                                 |          |
| H                      |      | 1.96            | 1.96                     | 1.97     |                                 |          |
| H                      |      | 3.82            | 3.72                     | 3.72     |                                 |          |
| H                      |      | 1.35            | 1.13                     | 1.14     |                                 |          |

**Figure S29** Experimental (Exp.) and calculated (Cal.)  $^1\text{H}$  and  $^{13}\text{C}$  chemical shift values of **3** and its possible isomers, respectively

| Functional<br>mPW1PW91 | Solvent?<br>PCM | Basis Set<br>6-31+G(d,p) |          | Type of Data<br>Unscaled Shifts |          |          |
|------------------------|-----------------|--------------------------|----------|---------------------------------|----------|----------|
|                        |                 | Isomer 1                 | Isomer 2 | Isomer 3                        | Isomer 4 | Isomer 5 |
| sDP4+ (H data)         |                 | 100.00%                  | 0.00%    | -                               | -        | -        |
| sDP4+ (C data)         |                 | 99.98%                   | 0.02%    | -                               | -        | -        |
| sDP4+ (all data)       |                 | 100.00%                  | 0.00%    | -                               | -        | -        |
| uDP4+ (H data)         |                 | 99.86%                   | 0.14%    | -                               | -        | -        |
| uDP4+ (C data)         |                 | 100.00%                  | 0.00%    | -                               | -        | -        |
| uDP4+ (all data)       |                 | 100.00%                  | 0.00%    | -                               | -        | -        |
| DP4+ (H data)          |                 | 100.00%                  | 0.00%    | -                               | -        | -        |
| DP4+ (C data)          |                 | 100.00%                  | 0.00%    | -                               | -        | -        |
| DP4+ (all data)        |                 | 100.00%                  | 0.00%    | -                               | -        | -        |

**Figure S30** DP4+ analysis of **3**

| Functional<br>mPW1PW91 |      | Solvent?<br>PCM | Basis Set<br>6-31+G(d,p) |          |          | Type of Data<br>Unscaled Shifts |          |
|------------------------|------|-----------------|--------------------------|----------|----------|---------------------------------|----------|
|                        |      | DP4+            | 100.00%                  | 0.00%    | 0.00%    | 0.00%                           | —        |
| Nuclei                 | sp2? | Experiment      | Isomer 1                 | Isomer 2 | Isomer 3 | Isomer 4                        | Isomer 5 |
| C                      |      | 78.81           | 78.6                     | 82.9     | 82.9     | 79.4                            |          |
| C                      |      | 83.93           | 80.5                     | 79.3     | 79.0     | 79.9                            |          |
| C                      |      | 78.11           | 80.9                     | 75.4     | 74.6     | 81.4                            |          |
| C                      |      | 86.34           | 88.0                     | 89.5     | 86.2     | 88.6                            |          |
| C                      |      | 91.2            | 82.1                     | 81.4     | 81.3     | 81.7                            |          |
| C                      |      | 73.26           | 77.8                     | 79.7     | 78.7     | 79.9                            |          |
| C                      |      | 140.91          | 147.2                    | 145.0    | 151.9    | 150.5                           |          |
| C                      |      | 128.49          | 127.9                    | 127.3    | 126.7    | 125.1                           |          |
| C                      |      | 133.1           | 140.7                    | 140.6    | 141.2    | 141.0                           |          |
| C                      |      | 131.52          | 132.6                    | 131.9    | 131.7    | 132.7                           |          |
| C                      |      | 136.09          | 137.6                    | 137.7    | 143.3    | 142.7                           |          |
| C                      |      | 119.38          | 119.41                   | 119.09   | 124.01   | 124.35                          |          |
| C                      |      | 154.91          | 156.46                   | 156.68   | 159.47   | 159.73                          |          |
| C                      |      | 108.81          | 111.21                   | 111.28   | 110.91   | 111.49                          |          |
| C                      |      | 172.13          | 171.88                   | 171.64   | 171.57   | 170.98                          |          |
| C                      |      | 88.13           | 88.09                    | 87.57    | 87.73    | 87.29                           |          |
| C                      |      | 165.39          | 163.87                   | 163.90   | 164.14   | 164.23                          |          |
| C                      |      | 26.3            | 17.96                    | 21.77    | 21.31    | 17.61                           |          |
| C                      |      | 12.76           | 12.66                    | 15.21    | 15.37    | 12.75                           |          |
| C                      |      | 12.19           | 20.45                    | 28.75    | 24.26    | 22.50                           |          |
| C                      |      | 7.83            | 10.35                    | 10.28    | 11.78    | 11.72                           |          |
| C                      |      | 56.29           | 56.06                    | 55.81    | 55.83    | 55.56                           |          |
| C                      |      | 12.76           | 20.88                    | 23.53    | 23.47    | 21.66                           |          |
| H                      |      | 4.08            | 3.79                     | 3.97     | 3.92     | 3.74                            |          |
| H                      |      | 3.79            | 3.79                     | 4.38     | 4.12     | 3.70                            |          |
| H                      |      | 3.69            | 3.59                     | 3.51     | 3.46     | 3.53                            |          |
| H                      |      | 6.01            | 6.38                     | 6.03     | 6.31     | 6.46                            |          |
| H                      |      | 6.43            | 6.37                     | 6.53     | 6.53     | 6.31                            |          |
| H                      |      | 6.65            | 6.65                     | 6.65     | 6.68     | 6.65                            |          |
| H                      |      | 6.5             | 6.52                     | 6.50     | 6.41     | 6.45                            |          |
| H                      |      | 7.16            | 7.23                     | 7.23     | 6.87     | 6.80                            |          |
| H                      |      | 6.89            | 6.46                     | 6.45     | 6.21     | 6.19                            |          |
| H                      |      | 5.64            | 5.33                     | 5.38     | 5.30     | 5.31                            |          |
| H                      |      | 1.3             | 1.25                     | 1.28     | 1.51     | 1.37                            |          |
| H                      |      | 1.2             | 1.19                     | 1.27     | 1.19     | 1.19                            |          |
| H                      |      | 1.32            | 1.38                     | 1.49     | 1.34     | 1.37                            |          |
| H                      |      | 2.02            | 1.90                     | 1.89     | 2.10     | 2.13                            |          |
| H                      |      | 3.92            | 3.74                     | 3.74     | 3.72     | 3.74                            |          |
| H                      |      | 1.22            | 1.18                     | 1.26     | 1.26     | 1.15                            |          |

**Figure S31** Experimental (Exp.) and calculated (Cal.)  $^1\text{H}$  and  $^{13}\text{C}$  chemical shift values of **4** and its possible isomers, respectively

| Functional<br>mPW1PW91 | Solvent?<br>PCM |          | Basis Set<br>6-31+G(d,p) |          | Type of Data<br>Unscaled Shifts |          |
|------------------------|-----------------|----------|--------------------------|----------|---------------------------------|----------|
|                        | Isomer 1        | Isomer 2 | Isomer 3                 | Isomer 4 | Isomer 5                        | Isomer 6 |
| sDP4+ (H data)         | 96.69%          | 2.92%    | 0.01%                    | 0.39%    | —                               | —        |
| sDP4+ (C data)         | 100.00%         | 0.00%    | 0.00%                    | 0.00%    | —                               | —        |
| sDP4+ (all data)       | 100.00%         | 0.00%    | 0.00%                    | 0.00%    | —                               | —        |
| uDP4+ (H data)         | 93.49%          | 6.47%    | 0.01%                    | 0.04%    | —                               | —        |
| uDP4+ (C data)         | 99.94%          | 0.05%    | 0.00%                    | 0.00%    | —                               | —        |
| uDP4+ (all data)       | 100.00%         | 0.00%    | 0.00%                    | 0.00%    | —                               | —        |
| DP4+ (H data)          | 99.79%          | 0.21%    | 0.00%                    | 0.00%    | —                               | —        |
| DP4+ (C data)          | 100.00%         | 0.00%    | 0.00%                    | 0.00%    | —                               | —        |
| DP4+ (all data)        | 100.00%         | 0.00%    | 0.00%                    | 0.00%    | —                               | —        |

**Figure S32** DP4+ analysis of **4**

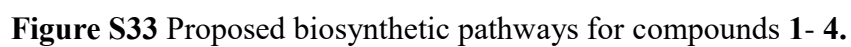

**Figure S33** Proposed biosynthetic pathways for compounds **1-4**.
